# Supplementary material
Source: PubMed Central journal article supplement (PMC4213179)
Supplement: supp_217.21.3929_JEB111260.pdf [file supp_217.21.3929_JEB111260.pdf]

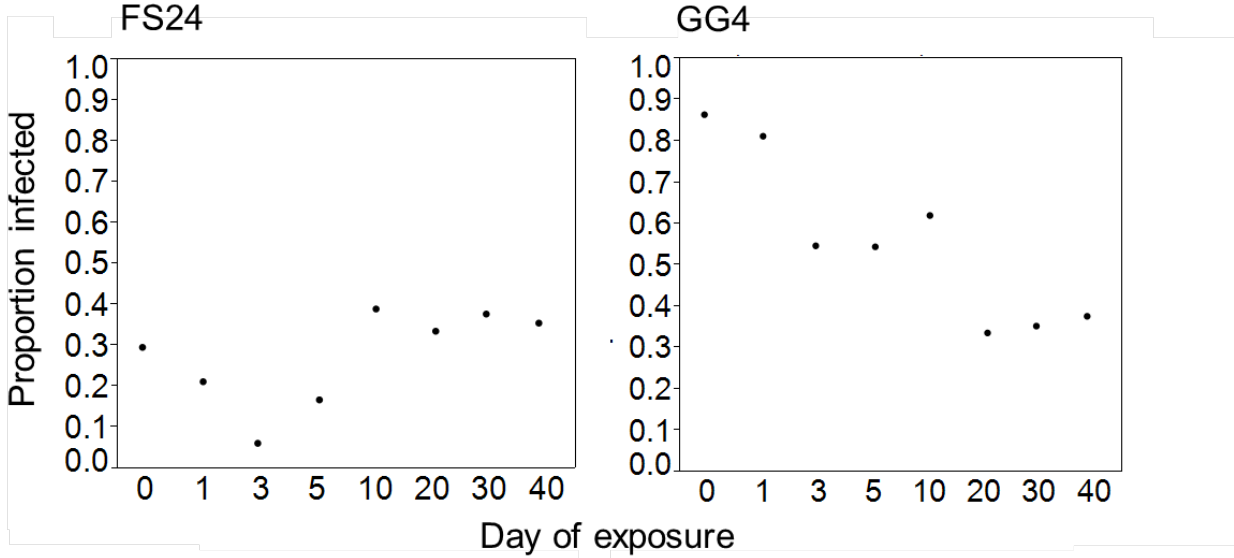

**Fig. S1.** The proportion of *D. magna* infected following exposure to the pathogen *P. ramosa* at one of eight ages (in days) for two clones Fs24 and GG4 (Experiment 1).

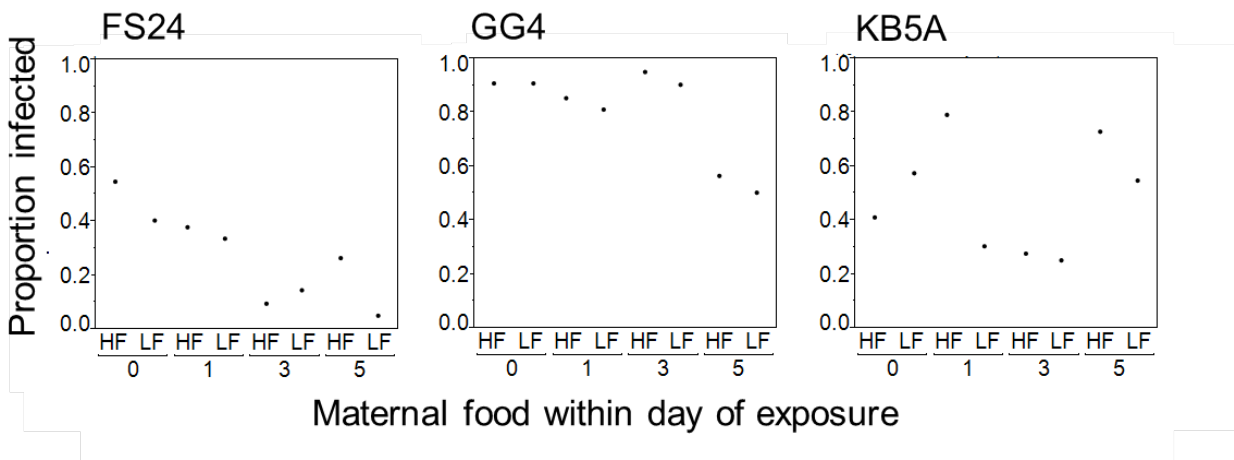

**Fig. S2.** The proportion of *D. magna* infected with the pathogen *P. ramosa* following exposure at one of 4 ages (in days) early in life (Experiment 2). The mothers of these *Daphnia* were raised under either high food (HF) or low food (LF) and the *Daphnia* are from three clones, Fs24, GG4 and KB5A.

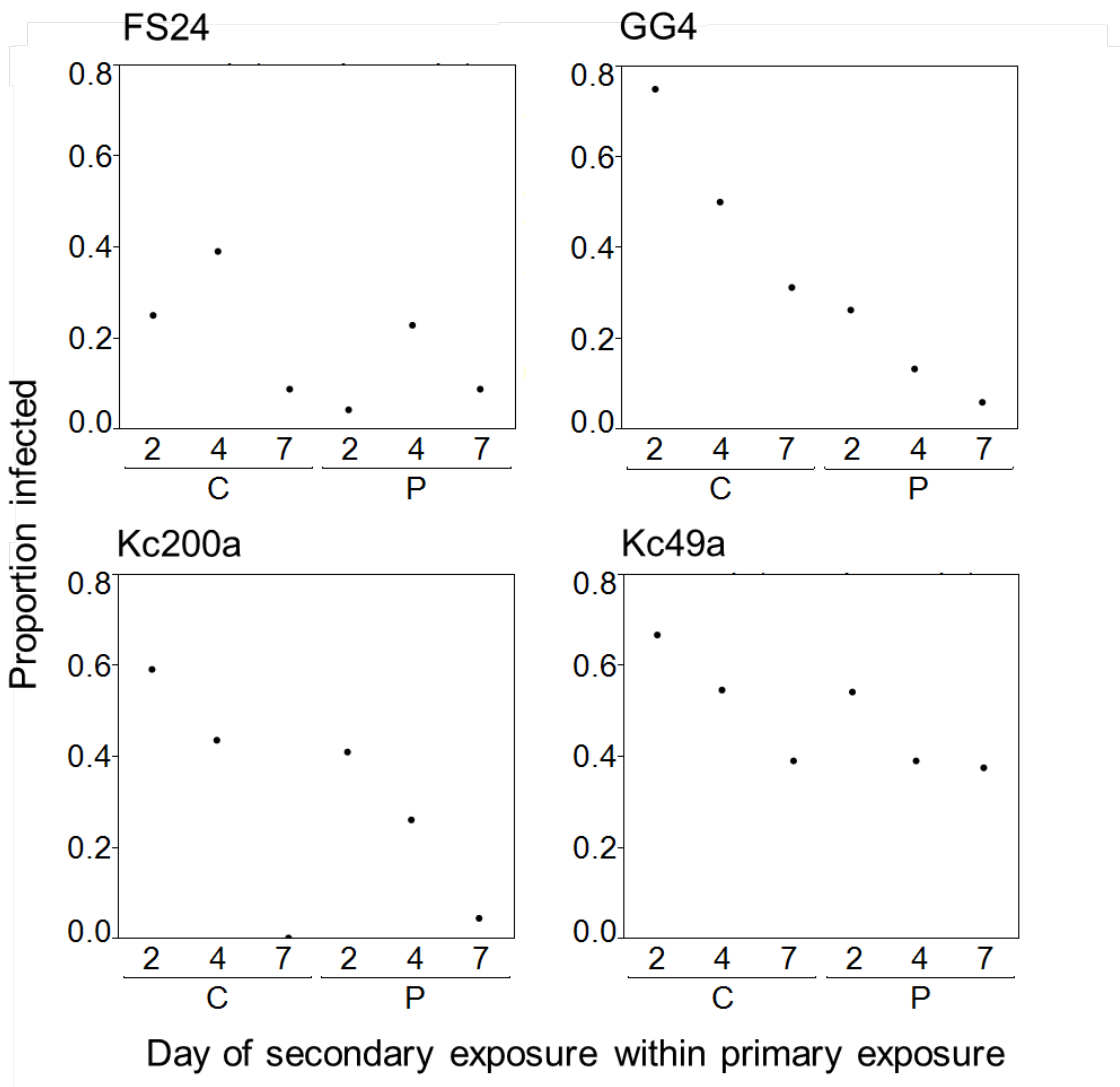

**Fig. 3.** The proportion of *D. magna* infected with the pathogen *P. ramosa* at three different time points (days) following a primary (and non-infective) exposure to the pathogen (P), or a control exposure (C) for four clones, Fs24, GG4, Kc200a and Kc49a (Experiment 3).

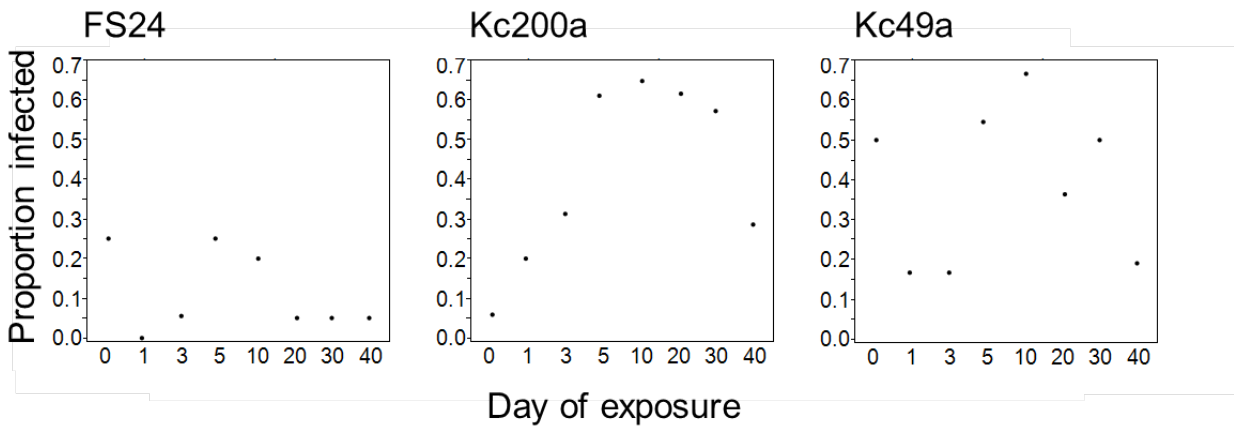

**Fig. 4.** The proportion of *D. magna* infected following exposure to the pathogen *P. ramosa* at one of eight ages (in days) in Experiment 4. Each exposure period lasted five days, and thus the day shown is the first day of a relatively long exposure period. Figure shows data for clones FS24, Kc200a and Kc49a.

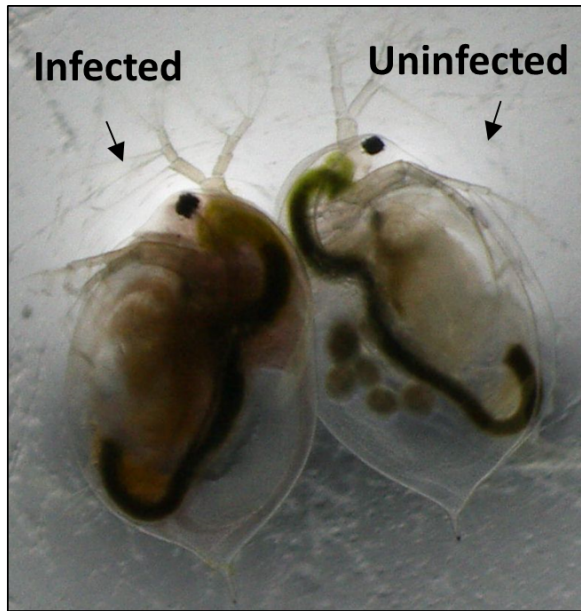

**Fig. S5.** *Pasteuria ramosa* infections are easy to discern with the naked eye. Infected *Daphnia* show reddish spore growth in the hemolymph and cease reproduction, so eggs are absent from the brood pouch.

[Download Table S1.](#)
